# Supplementary material for: Radiomics with structural magnetic resonance imaging, surface morphometry features, neurology scales, and clinical metrics to evaluate the neurodevelopment of preschool children with corrected tetralogy of Fallot
Source: PubMed Central journal article supplement — Transl Pediatr. 2024 Sep 26;13(9):1571–87. doi: 10.21037/tp-24-219 (PMC11467234; doi:10.21037/tp-24-219), 2024-09-26
Supplement: tp-13-09-1571-dss.pdf [file tp-13-09-1571-dss.pdf]

## Data Sharing Statement

|                     |                                                                                                                                                     |                                                                                                                                                                        |
|---------------------|-----------------------------------------------------------------------------------------------------------------------------------------------------|------------------------------------------------------------------------------------------------------------------------------------------------------------------------|
| <b>Article Info</b> | <a href="https://dx.doi.org/10.21037/tp-24-219">https://dx.doi.org/10.21037/tp-24-219</a>                                                           |                                                                                                                                                                        |
| <b>Item</b>         | <b>Question</b>                                                                                                                                     | <b>Authors' Response<br/>(place "-" if not applicable)</b>                                                                                                             |
| 1                   | Would you like to share data collected for your study to others?                                                                                    | Yes                                                                                                                                                                    |
| 2                   | If not, would you like to share the reason for your decision?                                                                                       | -                                                                                                                                                                      |
| 3                   | What data in particular will be shared?                                                                                                             | T1-3D MR images of tetralogy of Fallot in the preschool years, especially since we also have developmental scales and relevant clinical indicators for these children. |
| 4                   | Any other documents will be shared? Such as study protocol, statistical analysis plan, informed consent form, clinical study report, analytic code. | Statistical analysis plan, informed consent form, and clinical study report will also be shared if requested.                                                          |
| 5                   | When will data availability begin?                                                                                                                  | From the publication date.                                                                                                                                             |
| 6                   | When will data availability end?                                                                                                                    | One years within the publication date, since the technique or CHD data may be updated over time.                                                                       |
| 7                   | To whom will you share the data?                                                                                                                    | Research scholars interested in the neurodevelopment of children with congenital heart disease.                                                                        |
| 8                   | For what type of analysis or purpose?                                                                                                               | For exploring the neurodevelopment of children with congenital heart disease.                                                                                          |

|    |                                                  |                                                                                                                       |
|----|--------------------------------------------------|-----------------------------------------------------------------------------------------------------------------------|
| 9  | How or where can the data/documents be obtained? | Obtained by email from the corresponding author.<br>yangming19710217@163.com                                          |
| 10 | Any other restrictions?                          | We can evaluate the potential benefits and risks for each request and then share the data that is deemed appropriate. |
